# Supplementary material
Source: PubMed Central journal article supplement (PMC6599553)
Supplement: NIHMS1027779-supplement-1.pdf [file NIHMS1027779-supplement-1.pdf]

**eTable 1: Demographics of GLP-1 Analytical and Parent Program Cohorts.**

| <b>Parameter</b>                                | <b>GLP-1 cohort<br/>(n=157)</b> | <b>Parent cohort<br/>(n=345)</b> |
|-------------------------------------------------|---------------------------------|----------------------------------|
| Age, y, median (25th, 75th)                     | 62 (51, 70)                     | 62 (50, 71)                      |
| Male sex, n (%)                                 | 85 (54)                         | 184 (53.3)                       |
| Race/ethnicity, n (%)                           |                                 |                                  |
| Black or African American                       | 13 (8)                          | 32 (9.3)                         |
| Caucasian                                       | 139 (89)                        | 307 (89)                         |
| Other                                           | 5 (3)                           | 6 (1.7)                          |
| Charlson comorbidity index, median (25th, 75th) | 4 (2, 6)                        | 3 (1, 5)                         |
| Inter-facility hospital transfer, n (%)         | 68 (43)                         | 141 (40.9)                       |
| Primary sepsis diagnosis, n (%)                 |                                 |                                  |
| Intraabdominal sepsis                           | 65 (42)                         | 138 (40)                         |
| Pneumonia                                       | 28 (18)                         | 55 (16)                          |
| NSTI                                            | 25 (16)                         | 50 (14)                          |
| Surgical site infection                         | 21 (14)                         | 36 (10)                          |
| UTI                                             | 9 (6)                           | 36 (10)                          |
| Catheter-related bloodstream infection          | 2 (1.3)                         | 3 (1)                            |
| Bacteremia                                      | 1 (0.6)                         | 5 (1)                            |
| Empyema                                         | 1 (0.6)                         | 6 (2)                            |
| Other                                           | 2 (1.3)                         | 16 (5)                           |
| Sepsis severity, n (%)                          |                                 |                                  |
| Sepsis                                          | 57 (36)                         | 103 (29.9)                       |
| Severe sepsis                                   | 62 (40)                         | 147 (42.6)                       |
| Septic shock                                    | 38 (24)                         | 93 (27)                          |
| APACHE II, median (25th, 75th)                  | 17 (12, 23)                     | 17 (11, 23)                      |
| Maximum SOFA score, median (25th, 75th)         | 8 (4, 11)                       | 7 (5, 10)                        |
| Multiple organ failure*, n (%)                  | 79 (50)                         | 145 (42)                         |
| Ventilator days, median (25th, 75th)            | 2 (0, 6)                        | 2 (0, 6)                         |
| ICU LOS, median (25th, 75th)                    | 8 (4, 17)                       | 7 (3, 17)                        |
| Hospital LOS, median (25th, 75th)               | 17 (8, 28)                      | 15 (8, 26)                       |
| In-hospital mortality, n (%)                    | 12 (7.6)                        | 29 (8.4)                         |
| 6-month mortality, n (%)                        | 31 (19.7)                       | 61 (17.7)                        |

\* Denver Multiple Organ Failure score  $\geq 3$

LOS, length of stay; UTI, urinary tract infection; NSTI, necrotizing soft tissue infection; SOFA, sequential organ failure assessment
